# Supplementary material
Source: Springer Nature journal article supplement (https://www.springermedizin.de/resource/supplementary/13075_2012_4437_MOESM11_ESM.pdf/10110406)

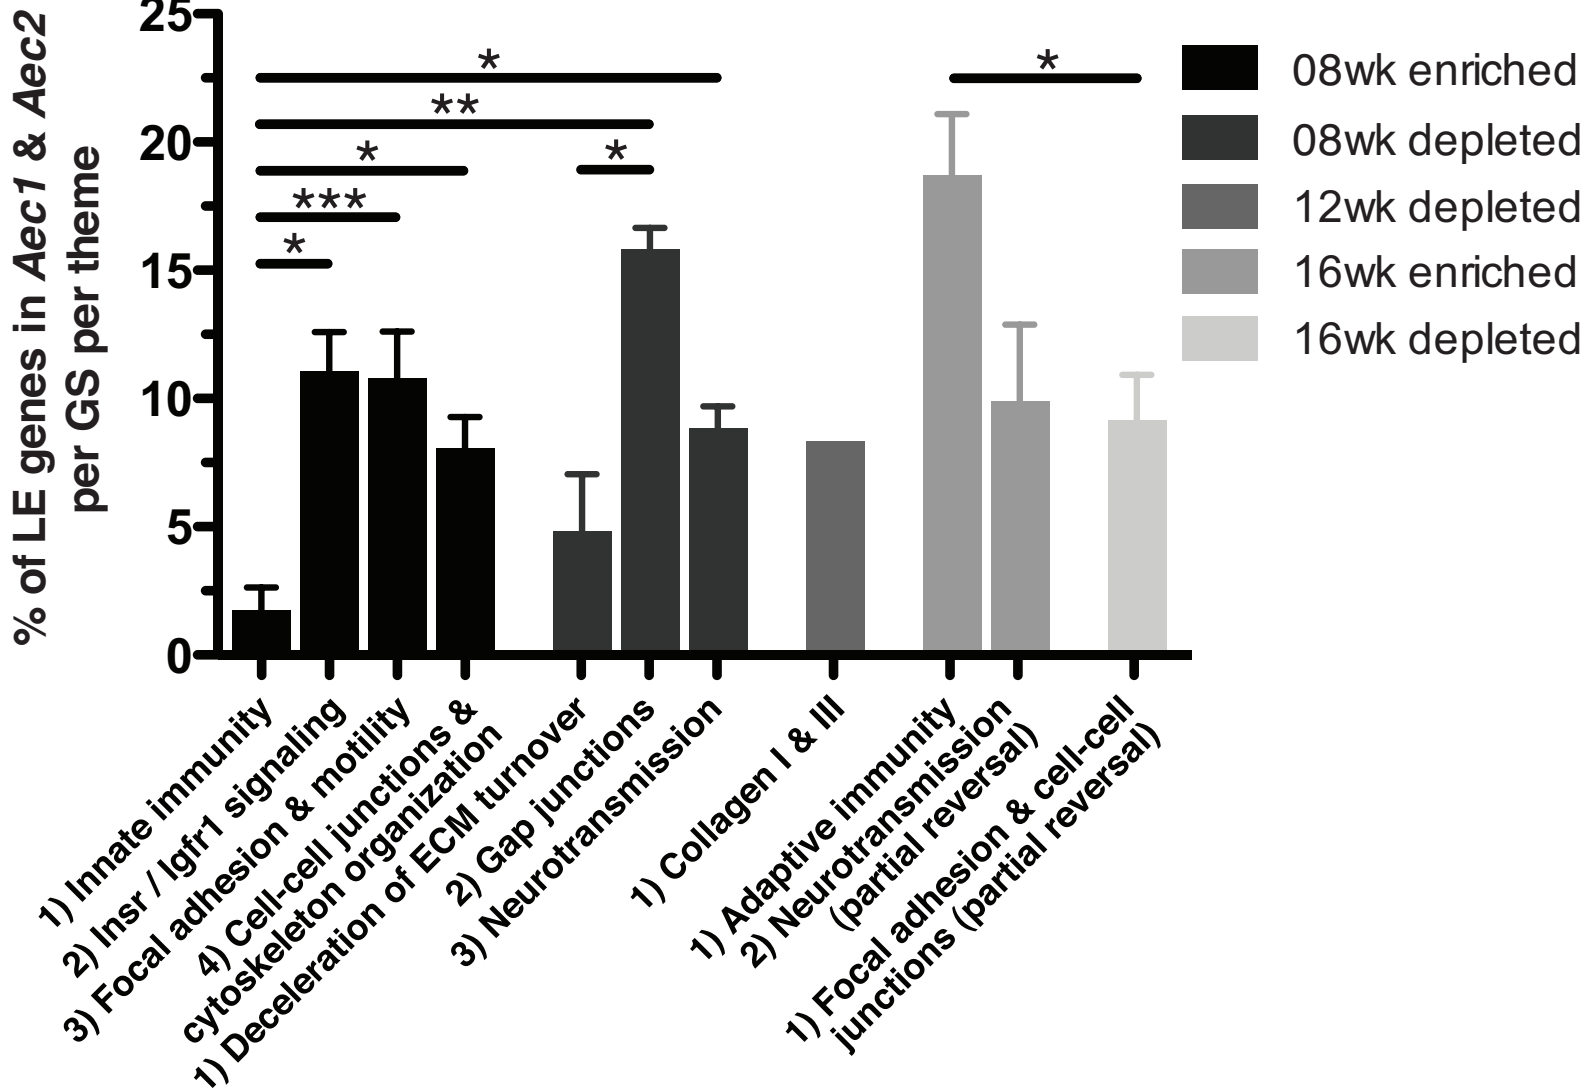

Supplement: MOESM11 [file 10110406]
